# Supplementary material
Source: ML conference proceedings conference paper supplement (https://proceedings.neurips.cc/paper_files/paper/2012/hash/0e9fa1f3e9e66792401a6972d477dcc3-Abstract.html)
Supplement: Supplementary file [file 0e9fa1f3e9e66792401a6972d477dcc3-Supplemental.zip]

---

# Supplementary Materials for “Topic-Partitioned Multinetwork Embeddings”

---

**Peter Krafft\***

CSAIL

MIT

pkrafft@mit.edu

**Juston Moore<sup>†</sup>, Bruce Desmarais<sup>‡</sup>, Hanna Wallach<sup>†</sup>**

<sup>†</sup>Department of Computer Science, <sup>‡</sup>Department of Political Science

University of Massachusetts Amherst

<sup>†</sup>{jmoore, wallach}@cs.umass.edu

<sup>‡</sup>desmarais@polsci.umass.edu

## 1 Generative Process

The complete generative process for our model is as follows:

```

for topic  $t = 1, \dots, T$  do
  Topic-specific distribution over word types  $\phi^{(t)} \sim \text{Dir}(\beta)$ 
  for actor  $a = 1, \dots, A$  do
    Topic-specific point  $\mathbf{s}_a^{(t)} \sim \mathcal{N}(\mathbf{0}, \sigma_1^2 \mathbf{I})$ 
  end for
  Topic-specific bias  $b^{(t)} \sim \mathcal{N}(\mu, \sigma_2^2)$ 
end for
for email  $d = 1, \dots, D$  do
  Email-specific distribution over topics  $\theta^{(d)} \sim \text{Dir}(\alpha)$ 
  for position  $n = 1, \dots, \max(1, N^{(d)})$  do
    Topic assignment  $z_n^{(d)} \sim \theta^{(d)}$ 
    if  $N^{(d)} \neq 0$  then
      Token  $w_n^{(d)} \sim \phi^{(z_n^{(d)})}$ 
    end if
  end for
  for recipient  $r = 1, \dots, A$  do
    if  $r \neq a^{(d)}$  then
      Position assignment  $x_r^{(d)} \sim \text{U}(1, \dots, \max(1, N^{(d)}))$ 
      Recipient indicator  $y_r^{(d)} \sim \text{Bern}(p_{a^{(d)}r}^{(t)})$  assuming  $z_{x_r^{(d)}}^{(d)} = t$ 
    end if
  end for
end for

```

The corresponding directed graphical model is shown in Figure 1.

## 2 Definitions of Discrepancy Functions

The dyad intensity distribution [1] quantifies the level of node–node activity in a network. Letting  $N^{(1|a,r)} = \sum_{d=1}^D \mathbf{1}(a^{(d)} = a) \mathbf{1}(y_r^{(d)} = 1)$ ,<sup>1</sup> the dyad intensity for actors  $a$  and  $r$  is the geometric

---

\*Work done at the University of Massachusetts Amherst

<sup>1</sup>The function  $\mathbf{1}(\cdot)$  evaluates to one if its argument evaluates to true and evaluates to zero otherwise.

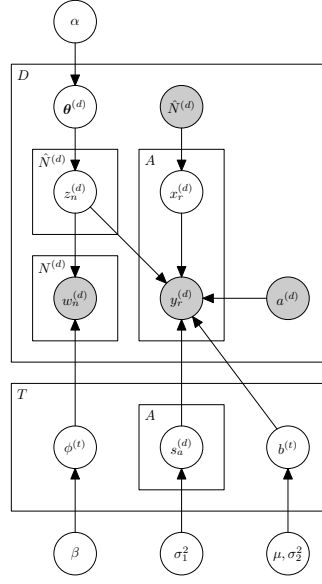

Figure 1: The directed graphical model for our model. Count  $\hat{N}^{(d)}$  is equal to  $\max(N^{(d)}, 1)$ , indicating that there is a single, “dummy” topic assignment  $z_1^{(d)}$  for any email that contains no text.

mean of the number of emails sent from  $a$  to  $r$  and the number of emails sent from  $r$  to  $a$ :

$$f_1(a, r; \mathcal{Y}) = \left( N^{(1|a,r)} N^{(1|r,a)} \right)^{\frac{1}{2}}.$$

The vertex degree of actor  $a$  is the number of emails sent to or from  $a$ :

$$f_2(a; \mathcal{Y}) = \sum_{r=1}^A \left( N^{(1|a,r)} + N^{(1|r,a)} \right).$$

The vertex degree distribution is the distribution of vertex degrees in a network.

The geodesic distance distribution [2] quantifies the connectivity of a network. We define the pairwise distance from actor  $a$  to actor  $r$  to be  $1 / N^{(1|a,r)}$ . The geodesic distance from any actor  $a'$  to any actor  $r'$  is the shortest path between them in the weighted graph induced by the set of pairwise distances. The geodesic distance distribution is the distribution of geodesic distances.

Generalized graph transitivity [3] quantifies the amount of clustering in a weighted network. We define a triple to be any set of three actors  $a$ ,  $r$ , and  $r'$ , such that there is at least one email from  $a$  to  $r$  and from  $r$  to  $r'$ . If there are also one or more emails from  $a$  to  $r'$ , then triple  $(a, r, r')$  is a transitive triple. Letting the value of triple  $(a, r, r')$  be  $N^{(1|a,r)} + N^{(1|r,r')}$ , generalized graph transitivity is defined as the ratio of the sum of the transitive triples’ values to the sum of all triples’ values.

## Acknowledgments

This work was supported in part by the Center for Intelligent Information Retrieval and in part by the NSF GRFP under grant #1122374. Any opinions, findings, and conclusions or recommendations expressed in this material are those of the authors and do not necessarily reflect those of the sponsors.

## References

- [1] D. Wyatt, T. Choudhury, and J. Bilmes. Discovering long range properties of social networks with multi-valued time-inhomogeneous models. In *Proceedings of the Twenty-Fourth AAAI Conference on Artificial Intelligence*, 2010.

- [2] J.H. Fowler. Legislative cosponsorship networks in the us house and senate. *Social Networks*, 28(4):454–465, 2006.
- [3] T. Opsahl and P. Panzarasa. Clustering in weighted networks. *Social Networks*, 31(2):155–163, 2009.
